# Supplementary material for: Strong main-chain length-dependence for the β-phase formation of oligofluorenes
Source: Royal Society of Chemistry journal article supplement (doi:10.1039/c5py00385g), 2015-01-01
Supplement: c5py00385g1.pdf [file c5py00385g1.pdf]

*Supplementary Information (ESI)*

Strong Main-Chain Length-Dependence for the  $\beta$ -Phase Formation  
of Oligofluorenes

Tomohiro Shiraki<sup>a</sup>, Shoichiro Shindome<sup>a</sup>, Fumiyuki Toshimitsu<sup>a</sup>, Tsuyohiko Fujigaya<sup>a</sup>, and Naotoshi Nakashima\* <sup>a,b,c</sup>

<sup>a</sup>*Department of Applied Chemistry, Graduate School of Engineering, Kyushu University, 744 Motoooka, Nishi-ku, Fukuoka 819-0395, Japan*

<sup>b</sup>*International Institute for Carbon Neutral Energy Research (WPI-I2CNER), Kyushu University, Fukuoka 819-0395, Japan*

<sup>c</sup>*Japan Science and Technology Agency (JST), Core Research for Evolutionary Science and Technology (CREST), 5 Sanbancho, Chiyoda-ku, Tokyo, 102-0075, Japan*

## Materials

Triisopropyl borate, 2-bromofluorene, iodine, anhydrous THF, *n*-butyl lithium, and tetrabutylammonium bromide were purchased from Wako Pure Chemical Industry.  $(\text{PPh}_3)_4\text{Pd}^0$ , 1-bromooctane and bromine were bought from Tokyo Chemical Industry.  $\text{Ni}(\text{COD})_2$ , COD, 2,2'-dibromo-9,9-dioctylfluorene and 2,2'-bipyridine were purchased from Sigma Aldrich Co. PFO (Mw ~58200, PDI ~3.68) was purchased from Sigma-Aldrich. All reagents were used without further purification.

## Instruments and procedure

AV300M (BRUKER BIOSPIN, 300 MHz) was used to measure  $^1\text{H}$  and  $^{13}\text{C}$  NMR spectra. UV-visible (UV/vis) absorption and fluorescence (Flu) spectra were measured using a spectrophotometer (JASCO, type V-670) and a spectrofluorometer (Horiba-Jobin Yvon, SPEX Fluorolog-3-NIR) equipped with a liquid-nitrogen-cooled InGaAs near-IR detector. Synthesized oligomers were separated using recycling gel permeation chromatography (GPC) (JAI, LC-908W-C60 equipped with preparative columns: JAIGEL-2.5H-40 and JAIGEL-2H-40). The computational calculation based on the density function theory (DFT) was carried out using Materials Science Suite (SCHRÖDINGER, Release 2014-2, Jaguar package) with no solvation. The initial structures were input maintaining  $\text{C}_{2v}$  symmetry in all the **FO**n. The distribution of the orbitals are visualized with the isovalue of 0.02.

**FO9**  
**<sup>1</sup>H NMR**

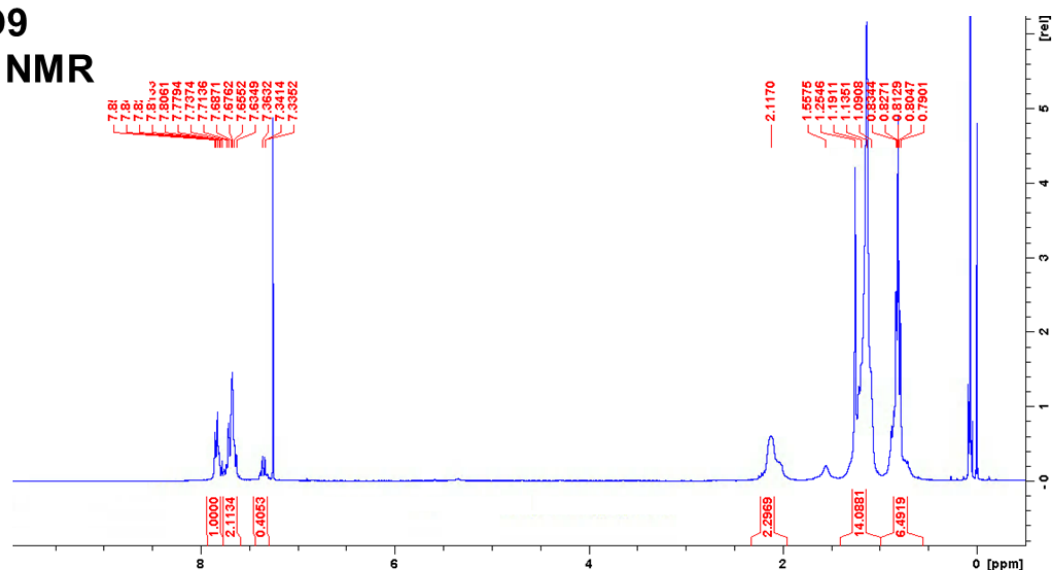

**FO9**  
**<sup>13</sup>C NMR**

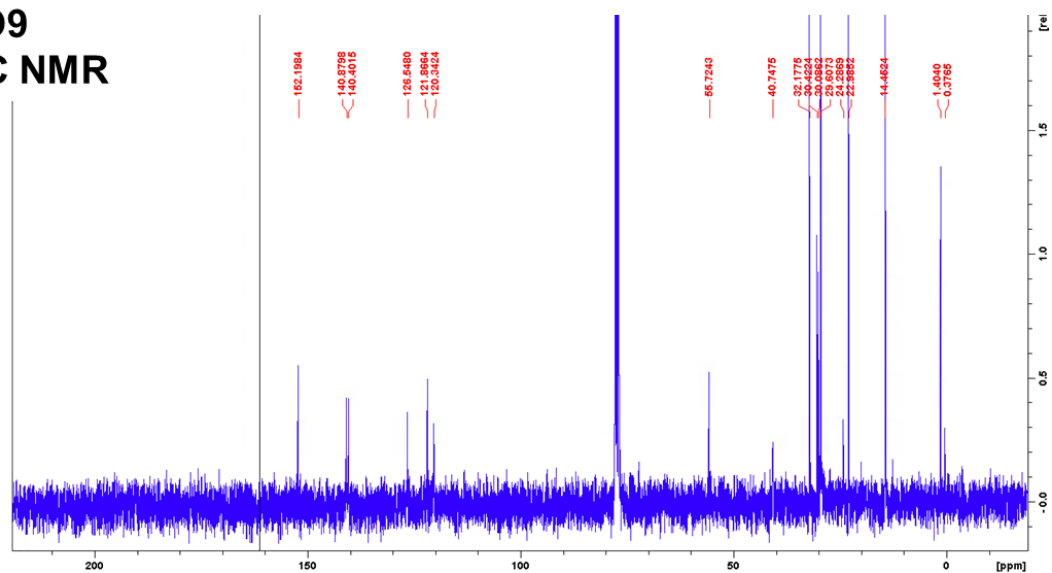

Fig. S1 <sup>1</sup>H and <sup>13</sup>C NMR spectra of **FO9**; CDCl<sub>3</sub>, r.t.

**FO12**  
**<sup>1</sup>H NMR**

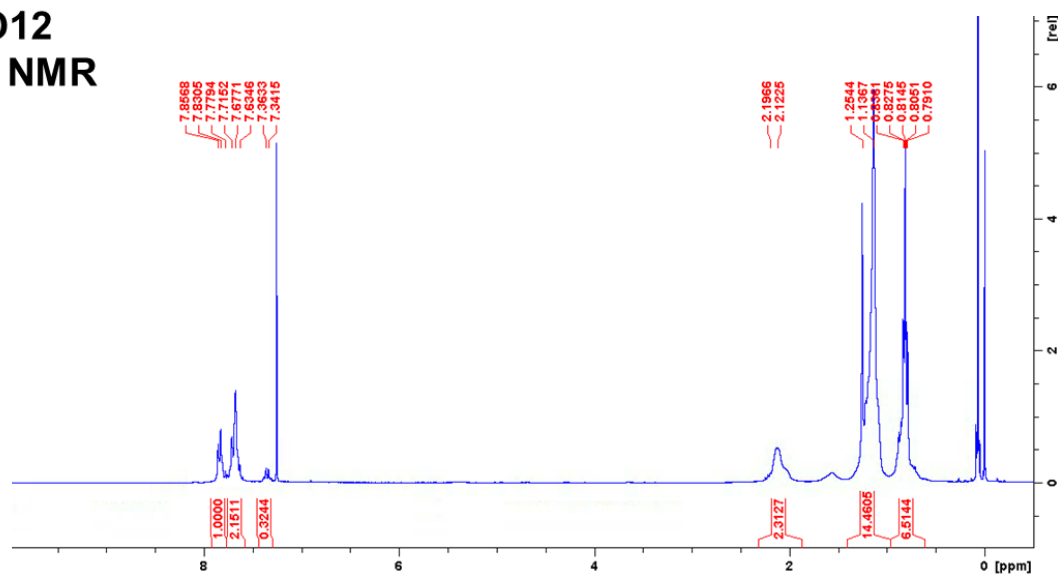

**FO12**  
**<sup>13</sup>C NMR**

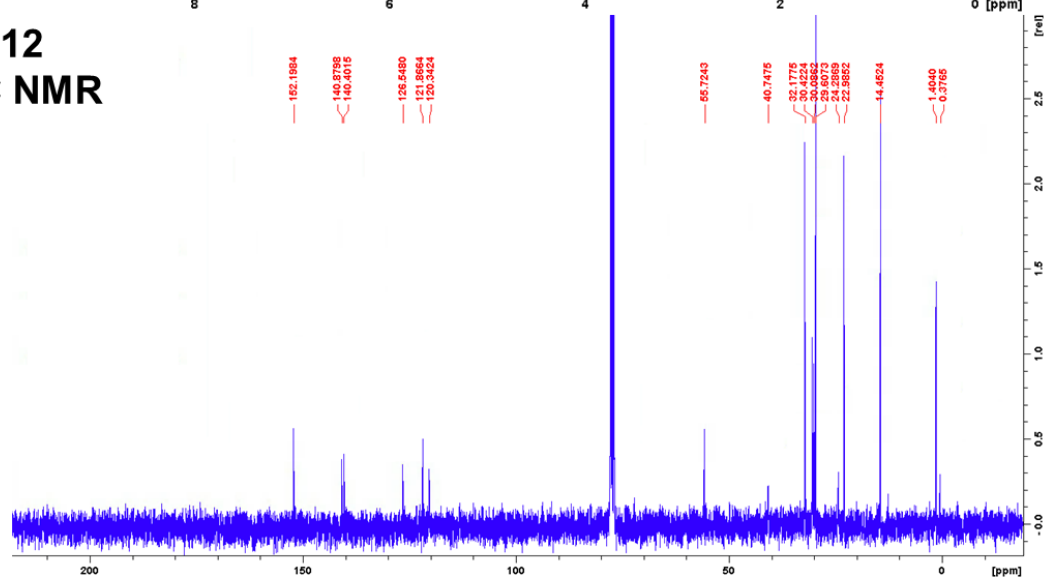

Fig. S2 <sup>1</sup>H and <sup>13</sup>C NMR spectra of **FO12**; CDCl<sub>3</sub>, r.t.

**FO15**  
**<sup>1</sup>H NMR**

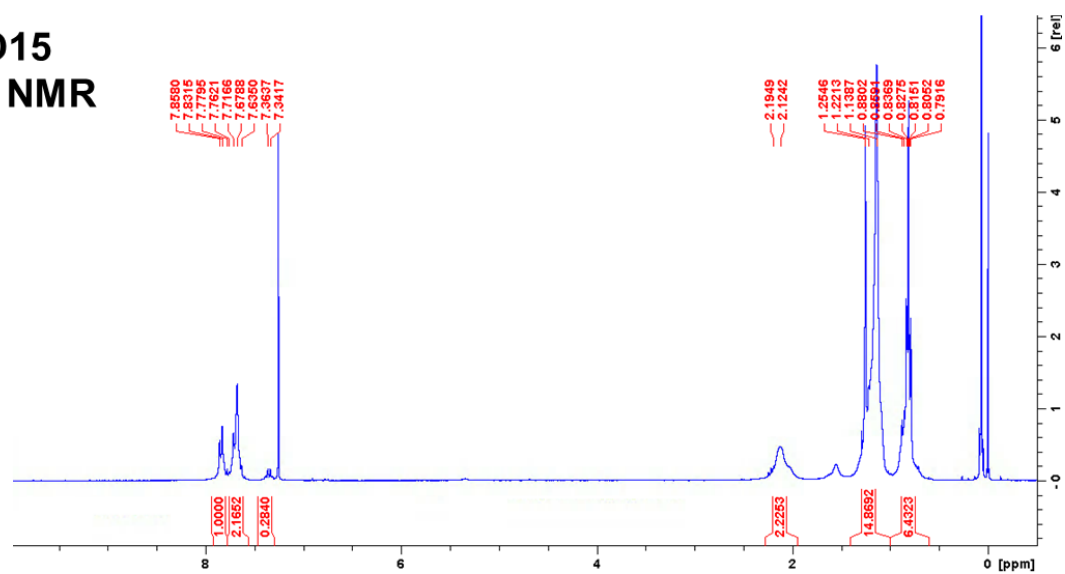

**FO15**  
**<sup>13</sup>C NMR**

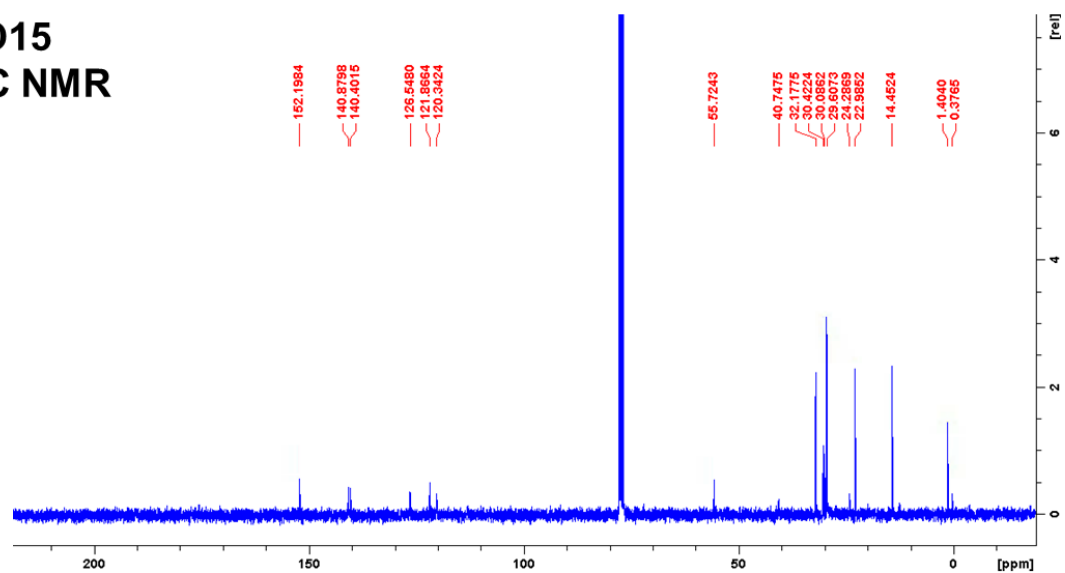

Fig. S3 <sup>1</sup>H and <sup>13</sup>C NMR spectra of **FO15**; CDCl<sub>3</sub>, r.t.

**FO18**  
**<sup>1</sup>H NMR**

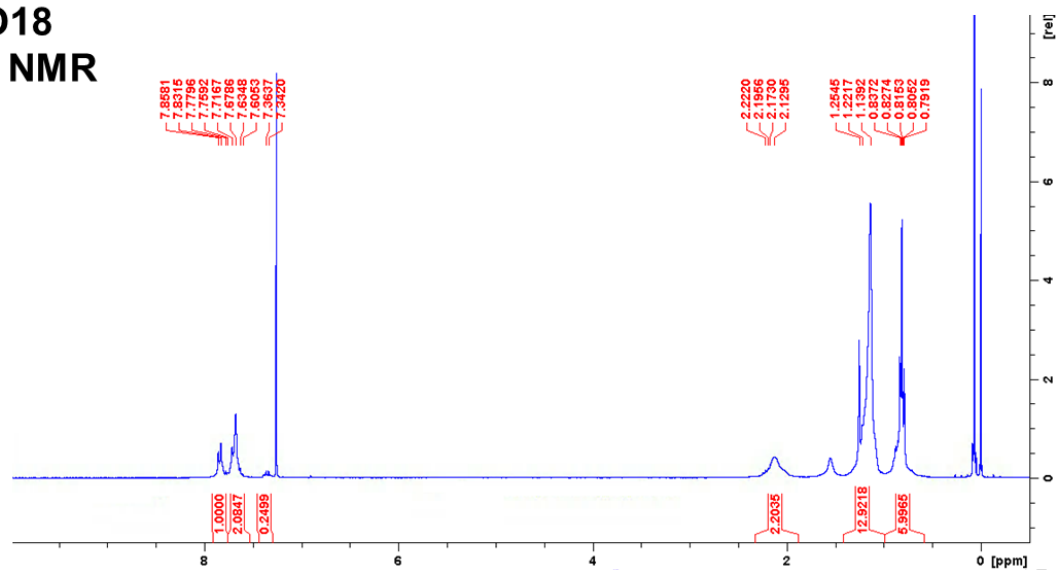

**FO18**  
**<sup>13</sup>C NMR**

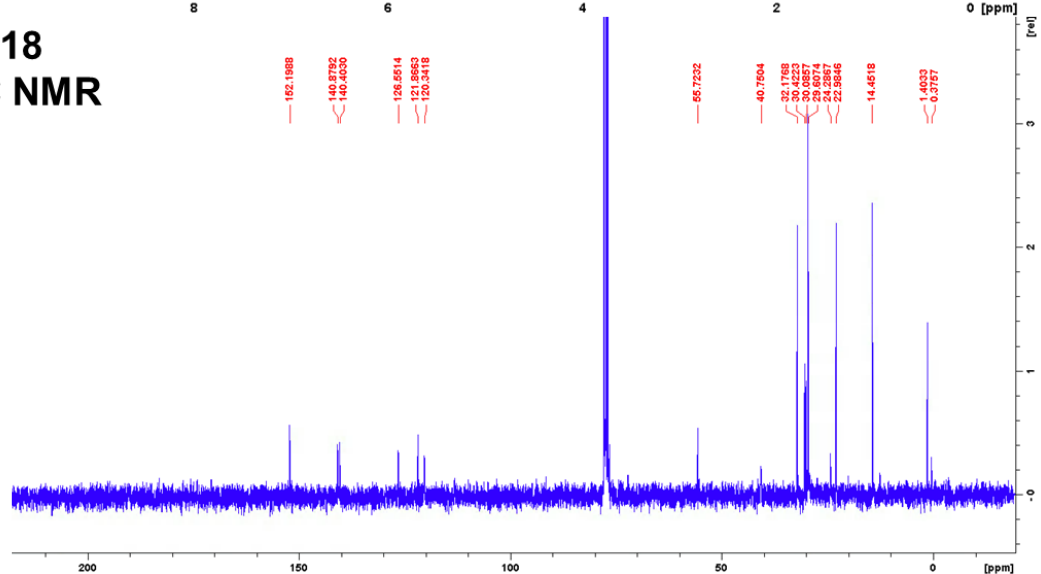

Fig. S4 <sup>1</sup>H and <sup>13</sup>C NMR spectra of **FO18**; CDCl<sub>3</sub>, r.t.

**FO21**  
**<sup>1</sup>H NMR**

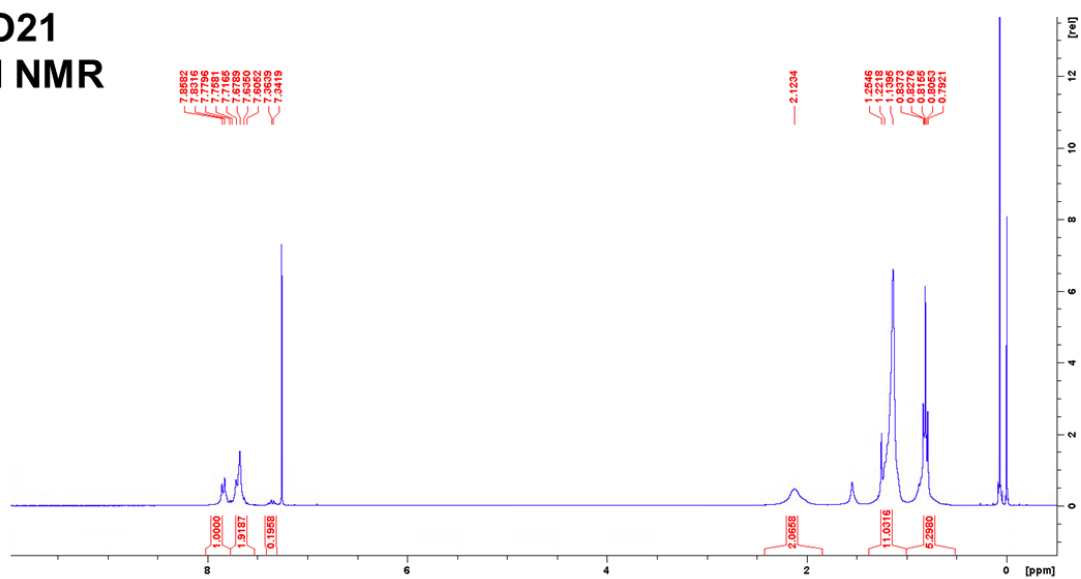

**FO21**  
**<sup>13</sup>C NMR**

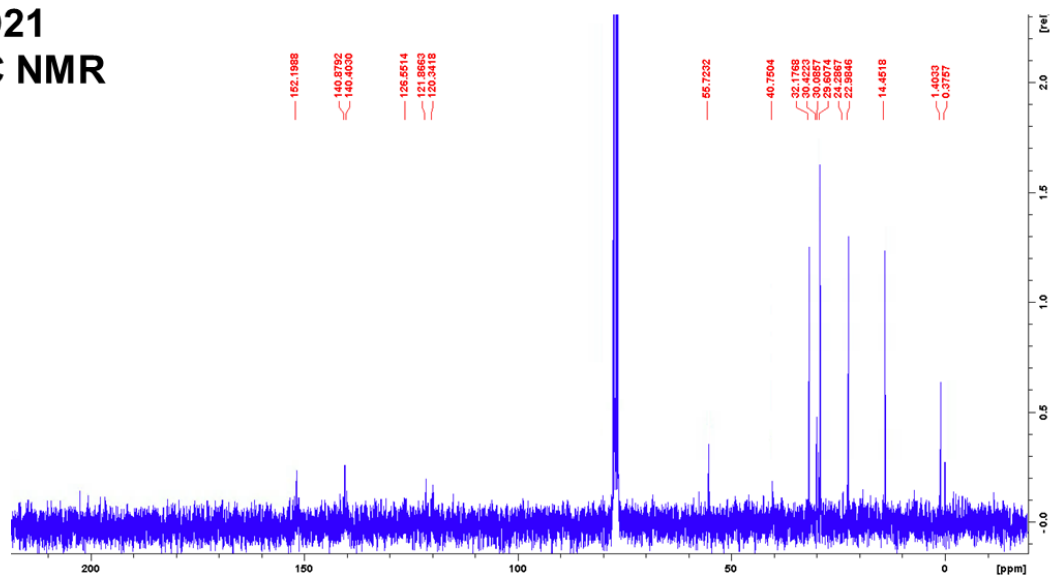

Fig. S5 <sup>1</sup>H and <sup>13</sup>C NMR spectra of **FO21**; CDCl<sub>3</sub>, r.t.

**FO24**  
**<sup>1</sup>H NMR**

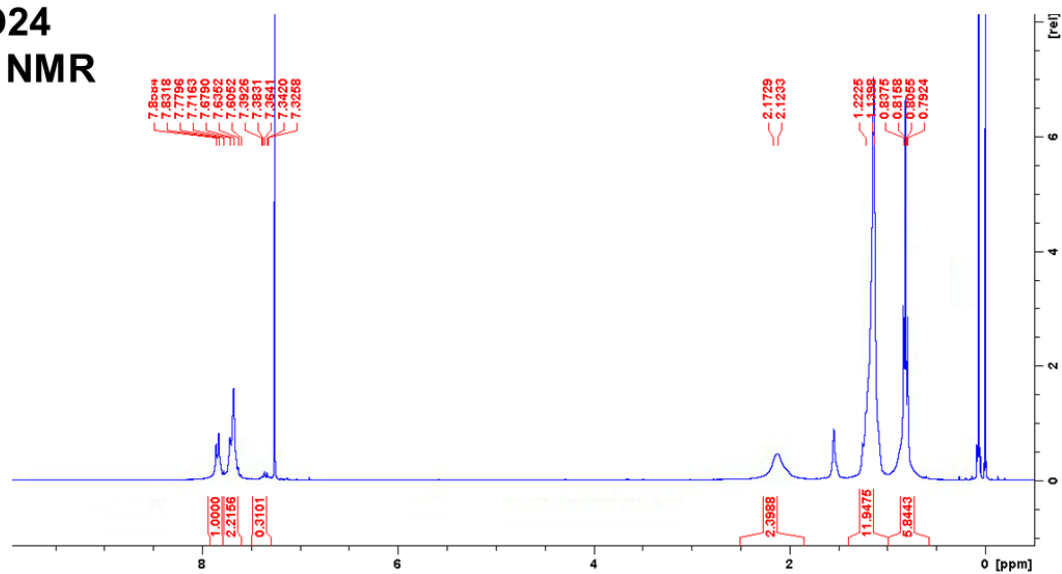

**FO24**  
**<sup>13</sup>C NMR**

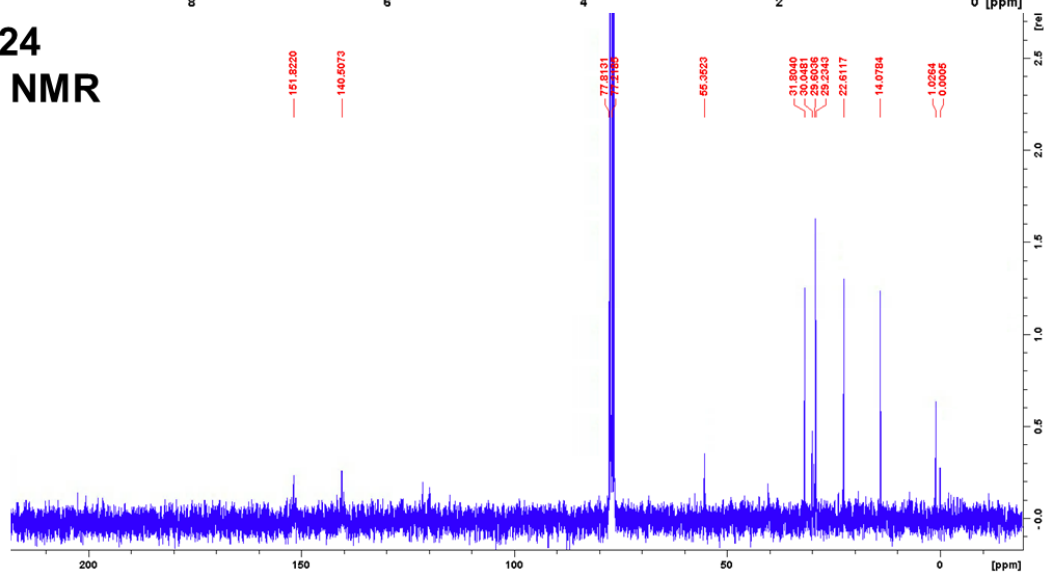

Fig. S6 <sup>1</sup>H and <sup>13</sup>C NMR spectra of **FO24**; CDCl<sub>3</sub>, r.t.



**FO27**  
**<sup>1</sup>H NMR**

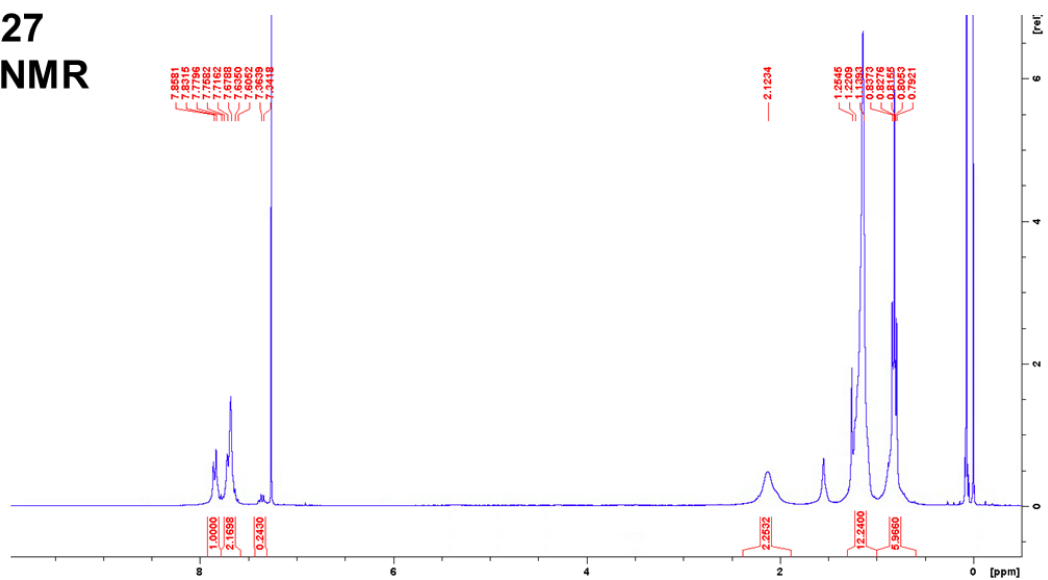

**FO27**  
**<sup>13</sup>C NMR**

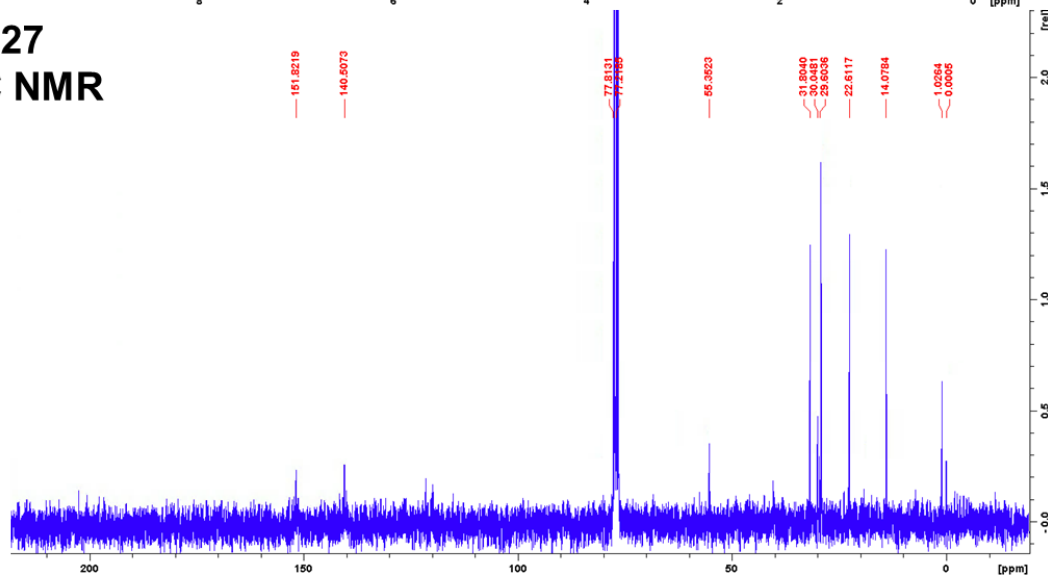

Fig. S7 <sup>1</sup>H- and <sup>13</sup>C NMR spectra of **FO27**; CDCl<sub>3</sub>, r.t.

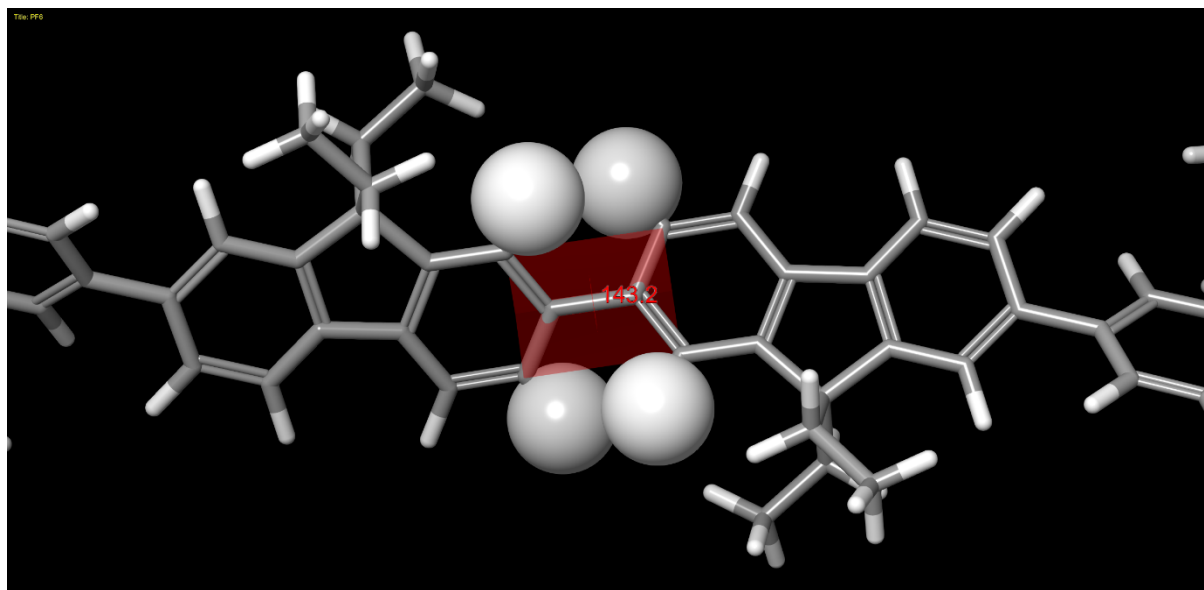

Fig. S8 A magnified illustration of the fused fluorene moiety and its dihedral angel (red). The hydrogen atoms around the fluorene-fluorene bond are represented in CPK model to clarify the steric repulsions.

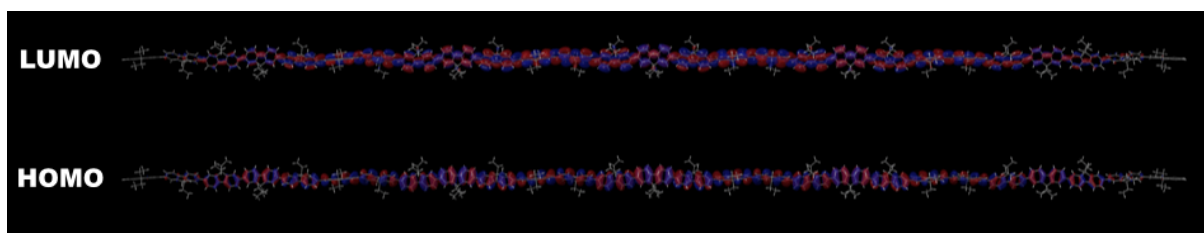

Fig. S9 Energy minimized structures of **FO27** obtained through a density functional theory (DFT) calculation based on the B3LYP 6-31G\* level. Visualized frontier orbitals (HOMO and LUMO) are overlaid in each image with the isovalue of 0.005.
